# Supplementary material for: Enhanced redox kinetics of polysulfides by nano-rod FeOOH for ultrastable lithium–sulfur batteries
Source: Royal Society of Chemistry journal article supplement (doi:10.1039/d0ta06701f), 2020-01-01
Supplement: d0ta06701f1.pdf [file d0ta06701f1.pdf]

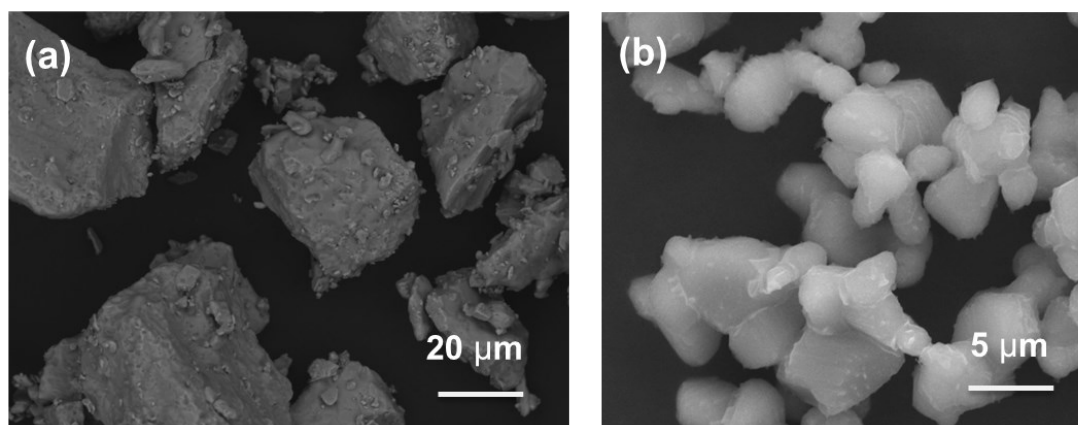

Fig. S1 The SEM images of (a) sublimed sulfur and (b) modified sulfur.

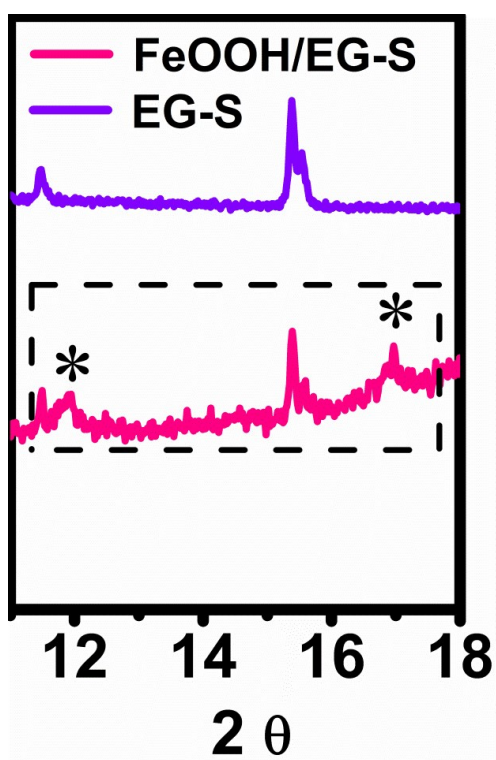

Fig. S2 XRD patterns of EG-S and FeOOH/EG-S composite.

Fig. S3 Raman  $I_D/I_G$  ratio for different samples

| Sample     | $I_D/I_G$ |
|------------|-----------|
| EG         | 0.92      |
| FeOOH/EG   | 0.96      |
| EG-S       | 0.91      |
| FeOOH/EG-S | 0.99      |

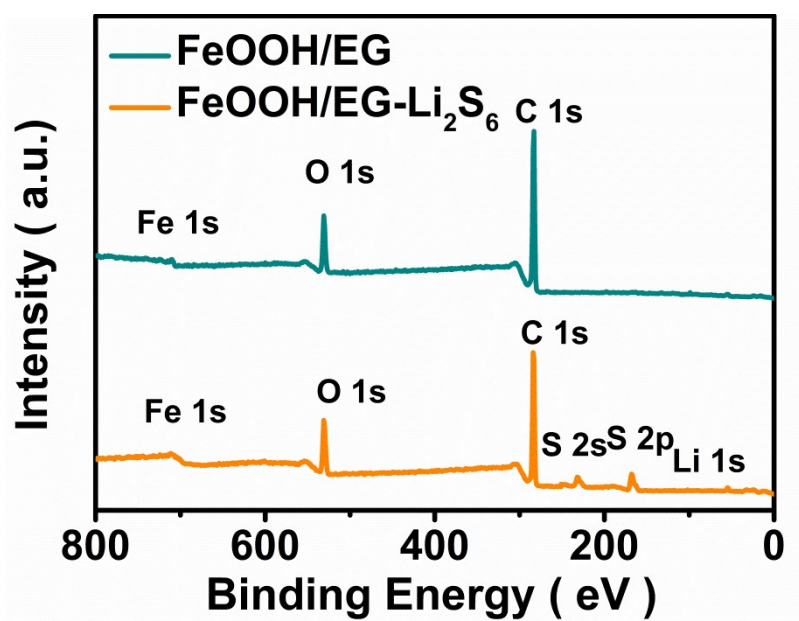

Fig. S4 XPS survey spectra for FeOOH/EG-S before and after adsorption.

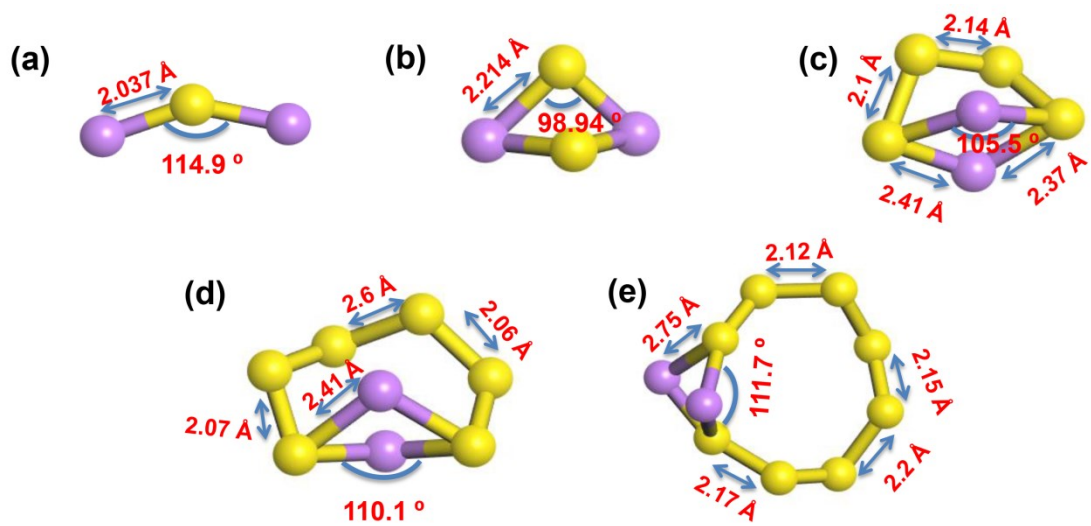

Fig. S5 Fully optimized molecular structures of isolated (a)  $\text{Li}_2\text{S}$ , (b)  $\text{Li}_2\text{S}_2$ , (c)  $\text{Li}_2\text{S}_4$ , (d)  $\text{Li}_2\text{S}_6$  and (e)  $\text{Li}_2\text{S}_8$  in the ground states. The yellow and purple balls represent S and Li atoms, respectively.

The bond lengths and angles of each cluster are also listed.

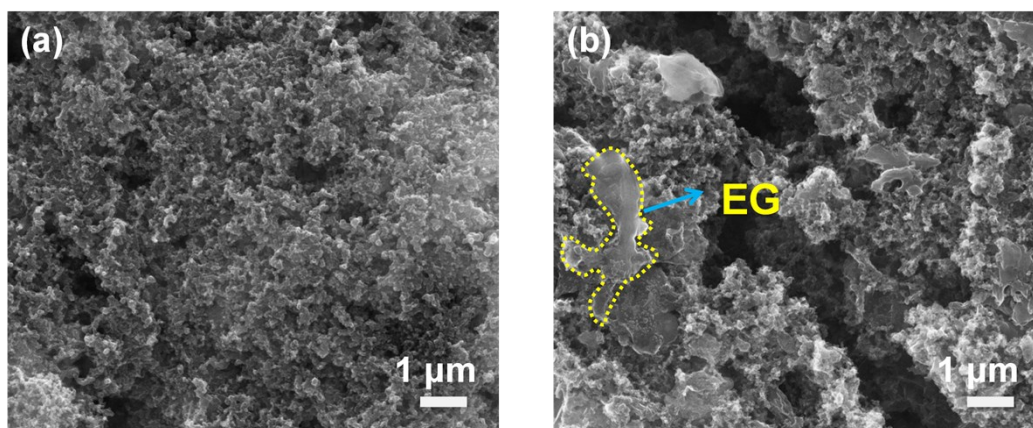

Fig. S6 (a) The SEM images of FeOOH/EG-S and (b) EG-S electrodes after 300 cycles.

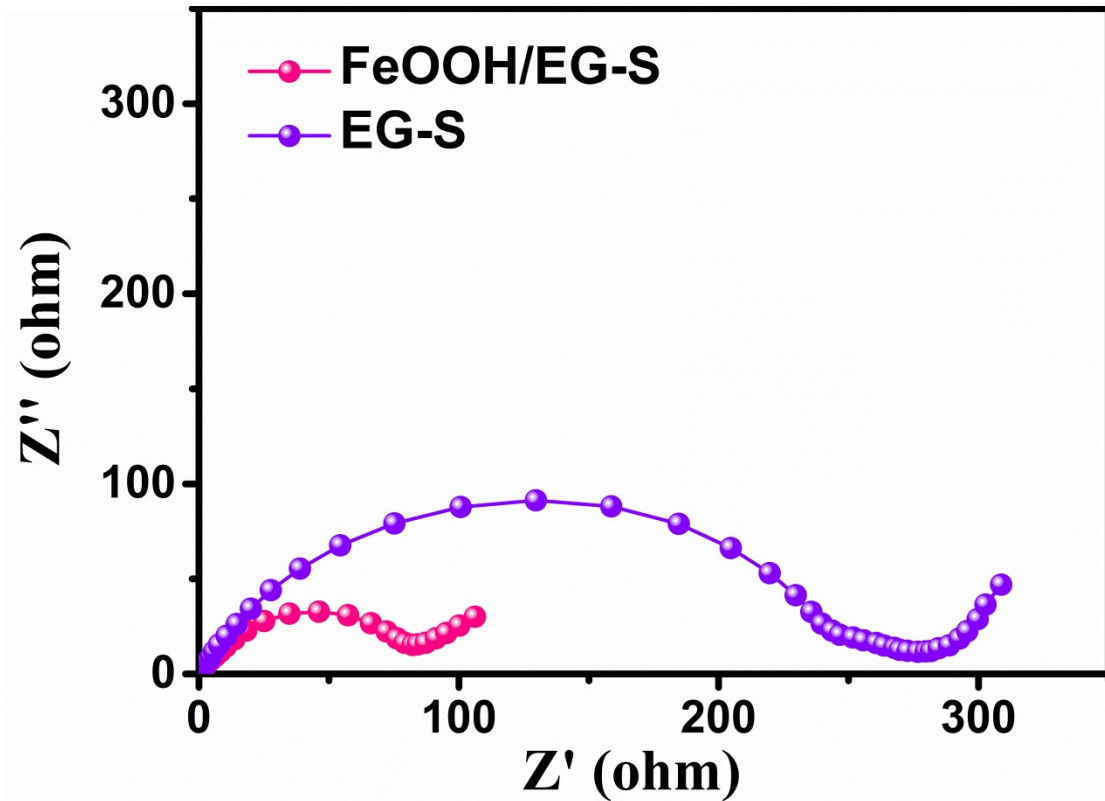

Fig. S7 (a) The EIS of FeOOH/EG-S and (b) EG-S electrodes after 300 cycles.

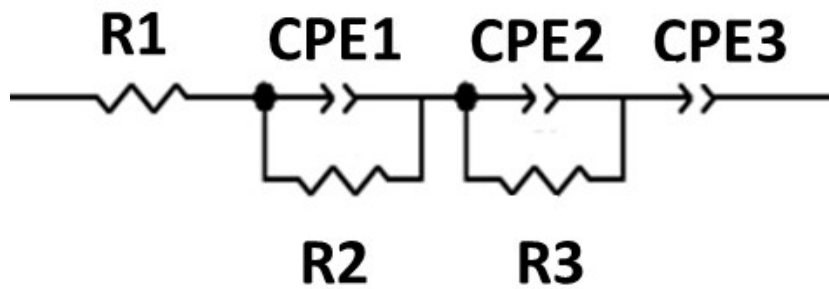

Fig. S8 Equivalent circuit diagram of the FeOOH/EG-S electrode
